# Supplementary material
Source: PubMed Central journal article supplement (PMC4045323)
Supplement: bi500136f_si_001.pdf [file bi500136f_si_001.pdf]

## Supporting Information

**Table S1.** Affinity of various gp120 ligands to WT and E275C YU-2 gp120 assessed using SPR. Corresponding sensorgrams are shown in Figures S12-S14.

| Analyte | $K_D$ (nM) |       |
|---------|------------|-------|
|         | WT         | E275C |
| sCD4    | 2.20       | 24.0  |
| 17b     | 18.0       | 44.5  |
| b12     | 28.0       | 21.0  |

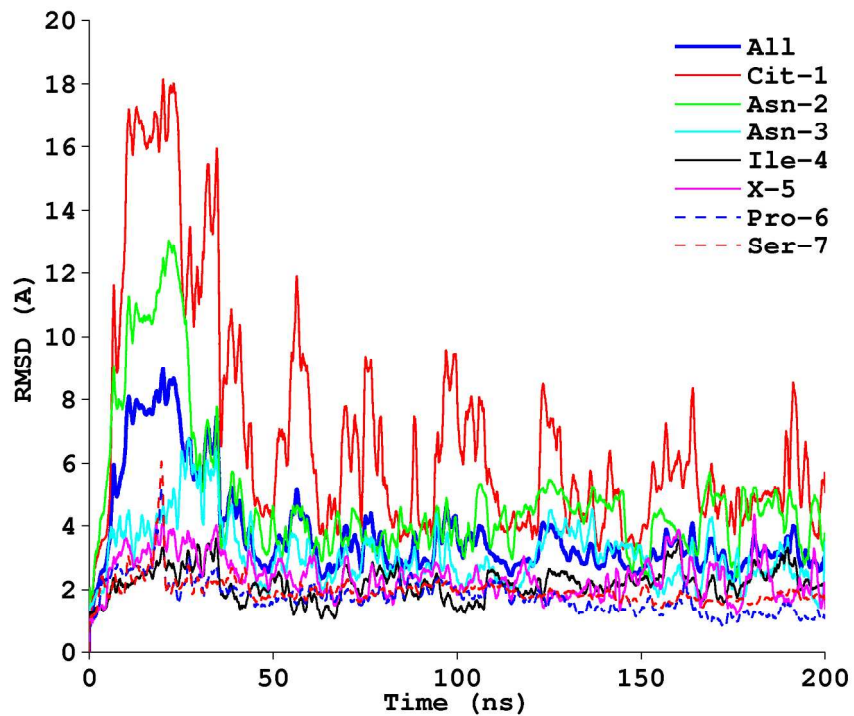

**Figure S1.** Heavy atom RMSD trace for various peptide residues during 200 ns of explicit-solvent all-atom MD equilibration of the minimum energy peptide triazole (UM101)/gp120 encounter complex. “X-5” denotes the derivatized azidoproline. The RMSD for all peptide residues is plotted in thick blue.

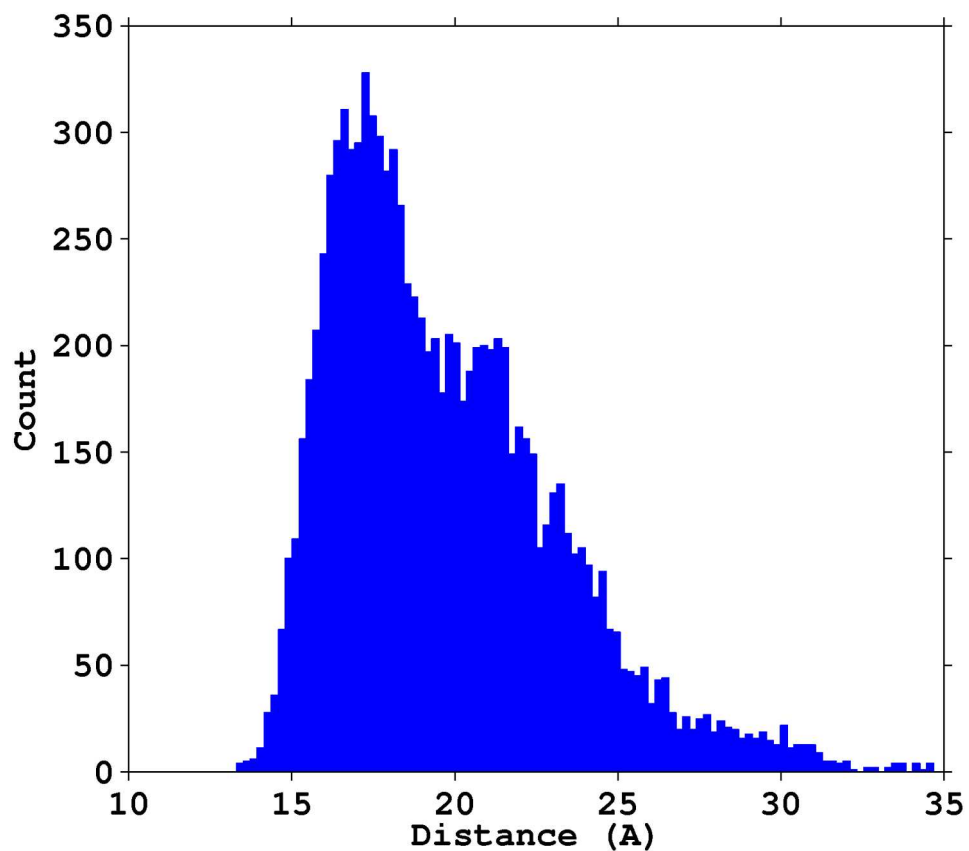

**Figure S2.** Frequency count for distance of the peptide backbone N-terminal nitrogen to gp120 E275 ( $C_\gamma$  atom of the side chain) throughout the 200 ns equilibration trajectory reported in this study. The data were grouped into 100 discrete bins. Mean = 19.73 Å; Mode = 17.41 Å.

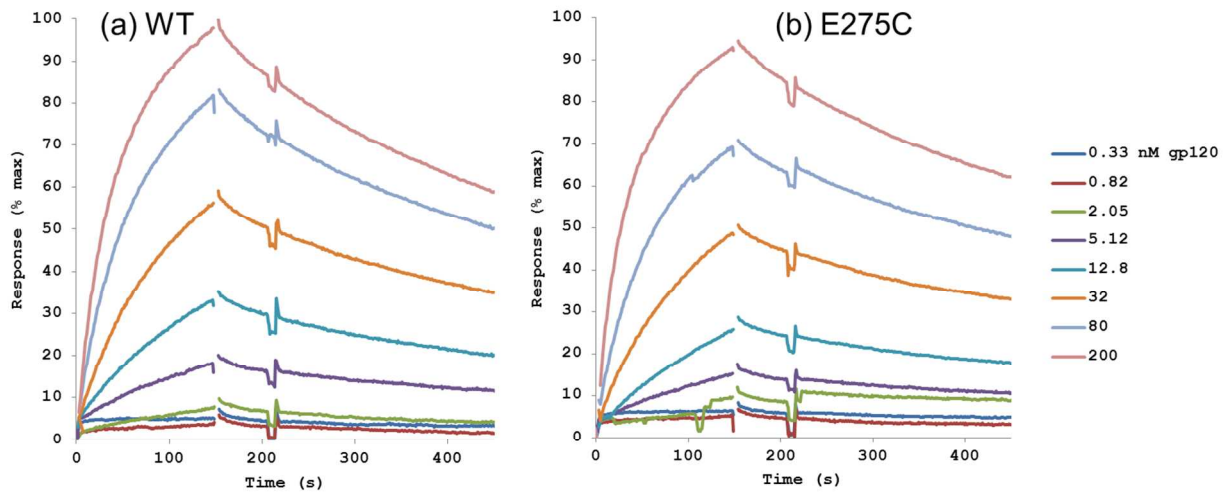

**Figure S3.** SPR sensorgrams for direct binding of **(a)** WT **(b)** E275C gp120 to a peptide triazole variant (SR07C) immobilized on the SPR chip surface. Numbers on the right show the gp120 concentrations in nM.

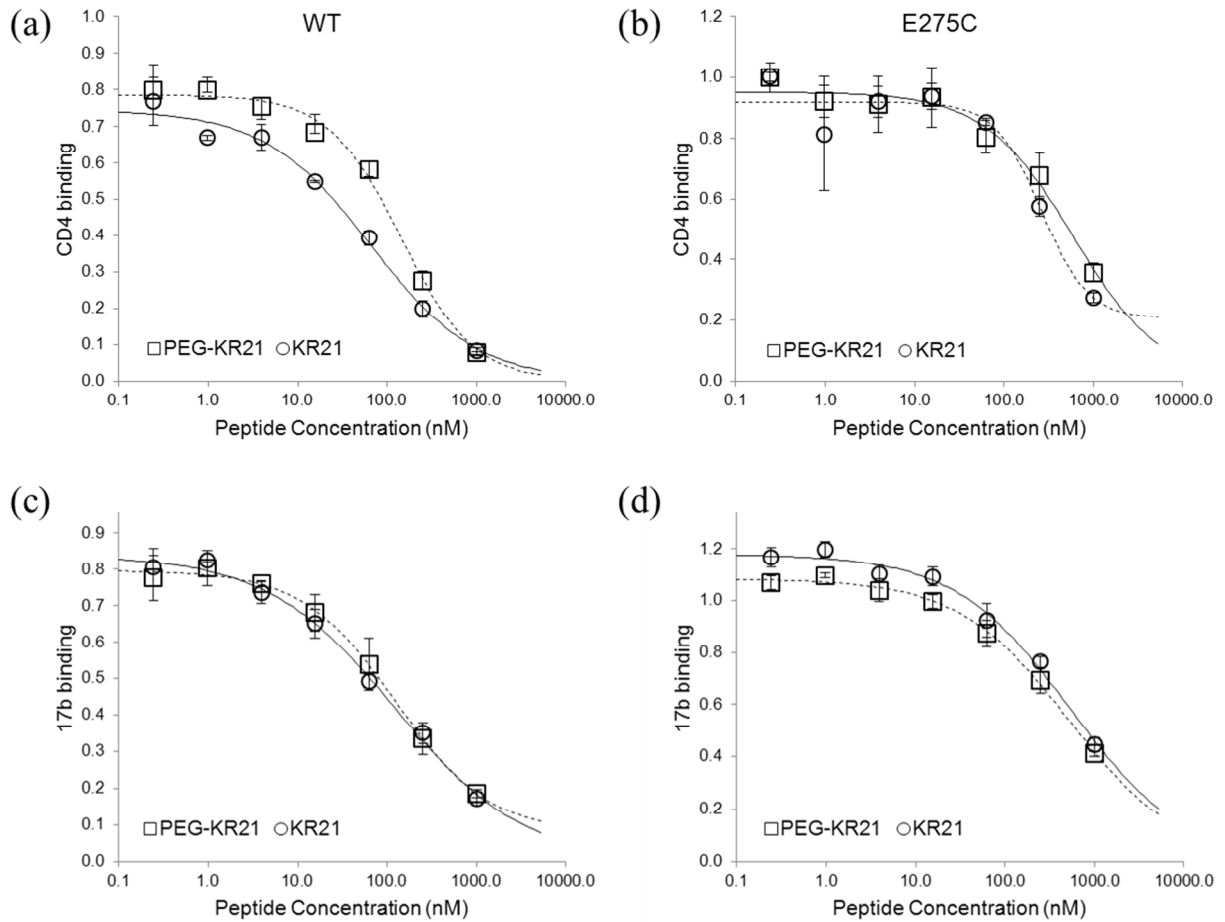

(e)

| Peptide  | WT <sub>IC50</sub> |     | E275C <sub>IC50</sub> |     |
|----------|--------------------|-----|-----------------------|-----|
|          | sCD4               | 17b | sCD4                  | 17b |
| KR21     | 66                 | 122 | 262                   | 520 |
| PEG-KR21 | 144                | 123 | 599                   | 502 |

**Figure S4.** Competition ELISA for inhibition of binding of (a) sCD4 to WT gp120 (b) sCD4 to E275C (c) mAb 17b to WT and (d) mAb 17b to E275C gp120 by KR21 (circles) or PEG-KR21 (squares). Error bars represent standard deviations (n=2). The data were fitted to a logistic curve and the results are provided as guide to the eye (solid lines for KR21 and dashed lines for PEG-KR21). (e) Approximate IC<sub>50</sub> values from the fits shown in panels a-d.

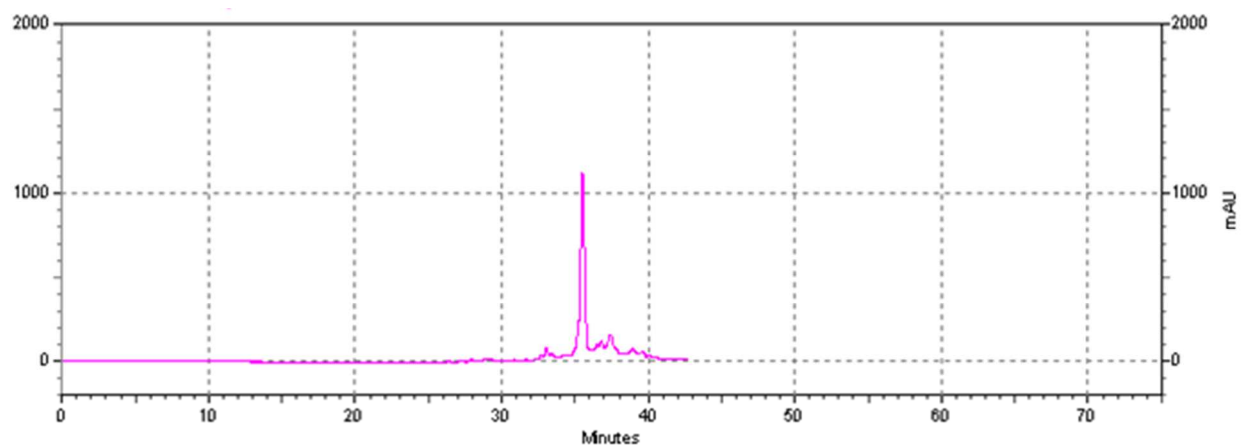

Figure S5. SR07C HPLC chromatogram.

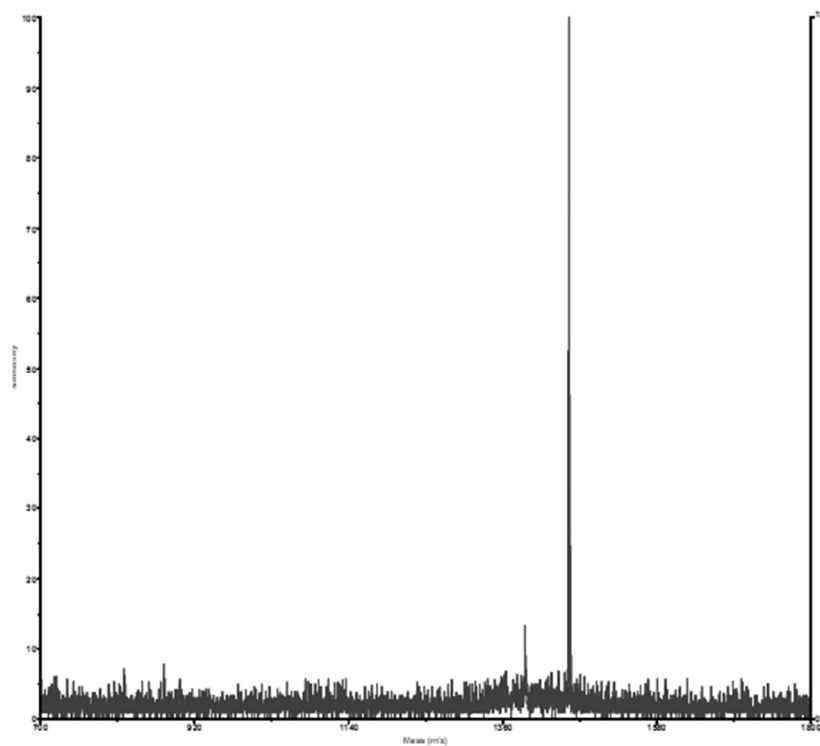

**Figure S6.** TOF MS results for SR07C. Observed MW=1453.5 Da, Expected MW=1453.8 Da.

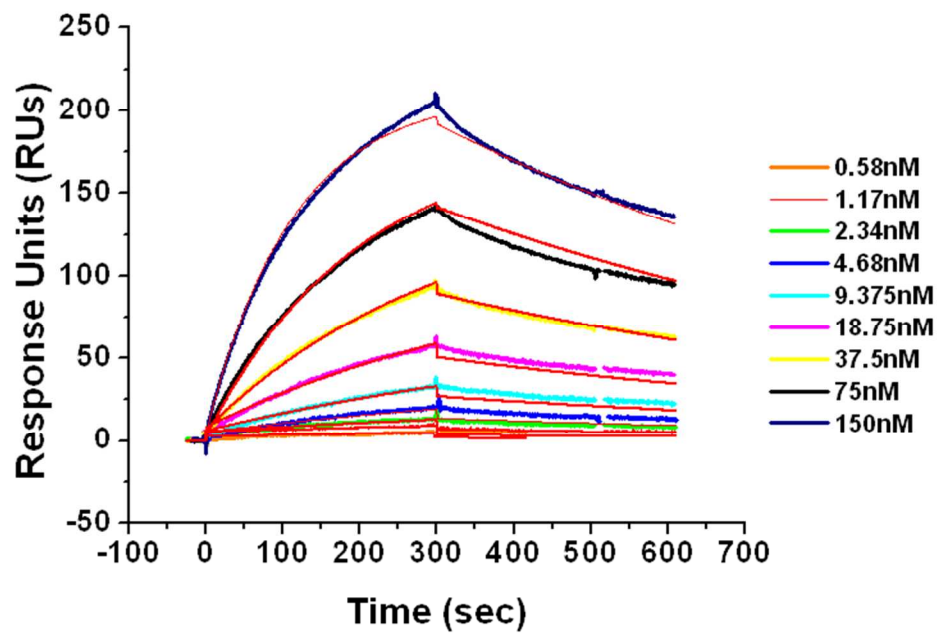

**Figure S7.** SPR sensorgram for determining SR07C affinity to gp120YU-2. Different concentrations of the latter (indicated in the figure inset) were passed over 23.2 RUs of SR07C surface-immobilized through the peptide C-terminal thiol. Curves were fit to a global 1:1 kinetic model and the results of the fit are shown in red overlay lines.  $K_D = 23.9$  nM.



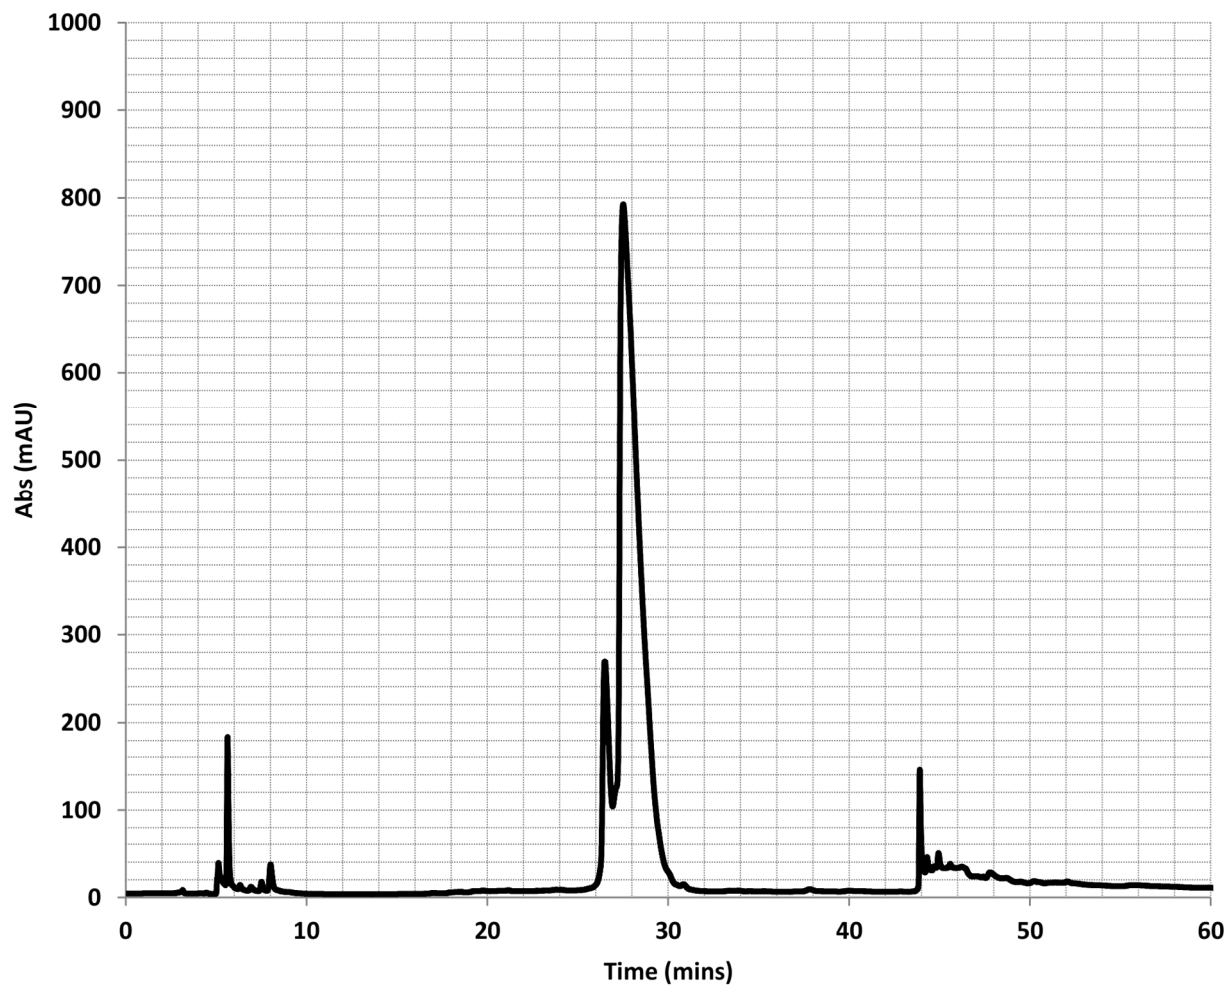

Figure S8. PEG-KR21 RP HPLC chromatogram

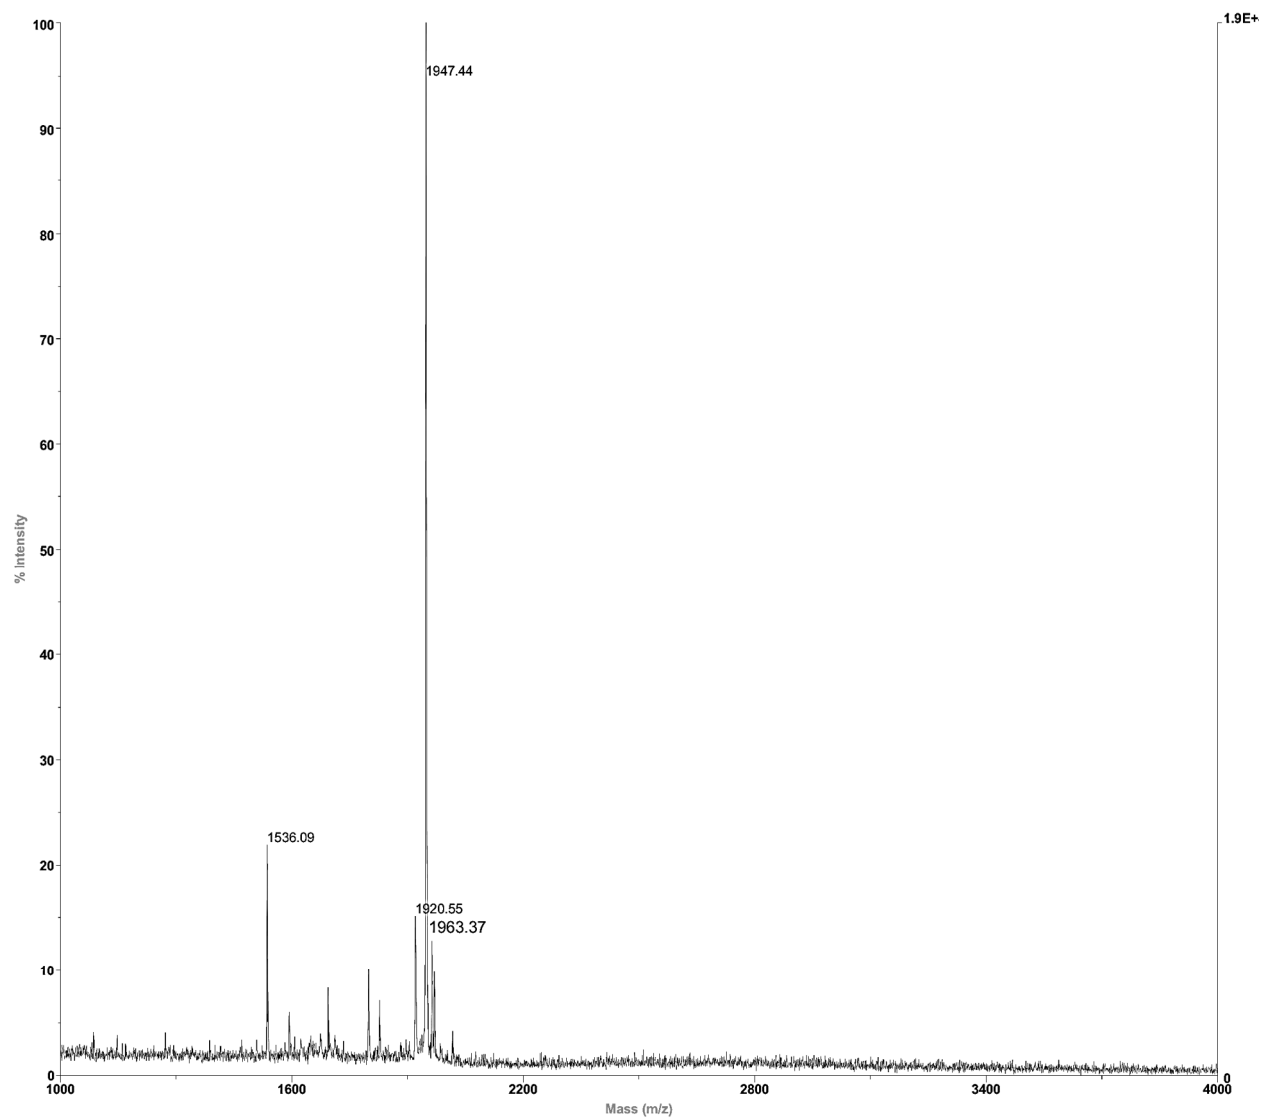

**Figure S9.** MALDI TOF MS results for PEG-KR21. Observed MW=1947.44 Da, Expected MW=1946.1 Da.

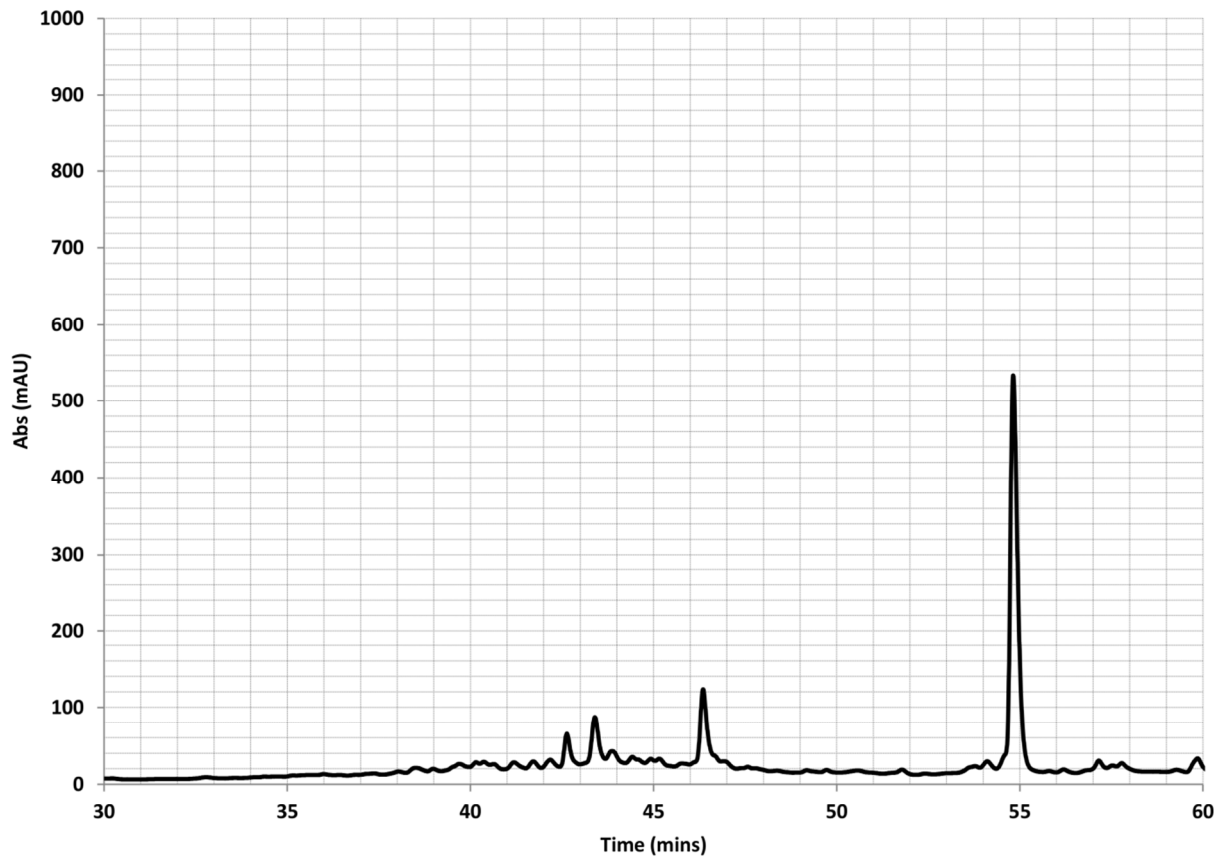

Figure S10. AE21 RP HPLC chromatogram

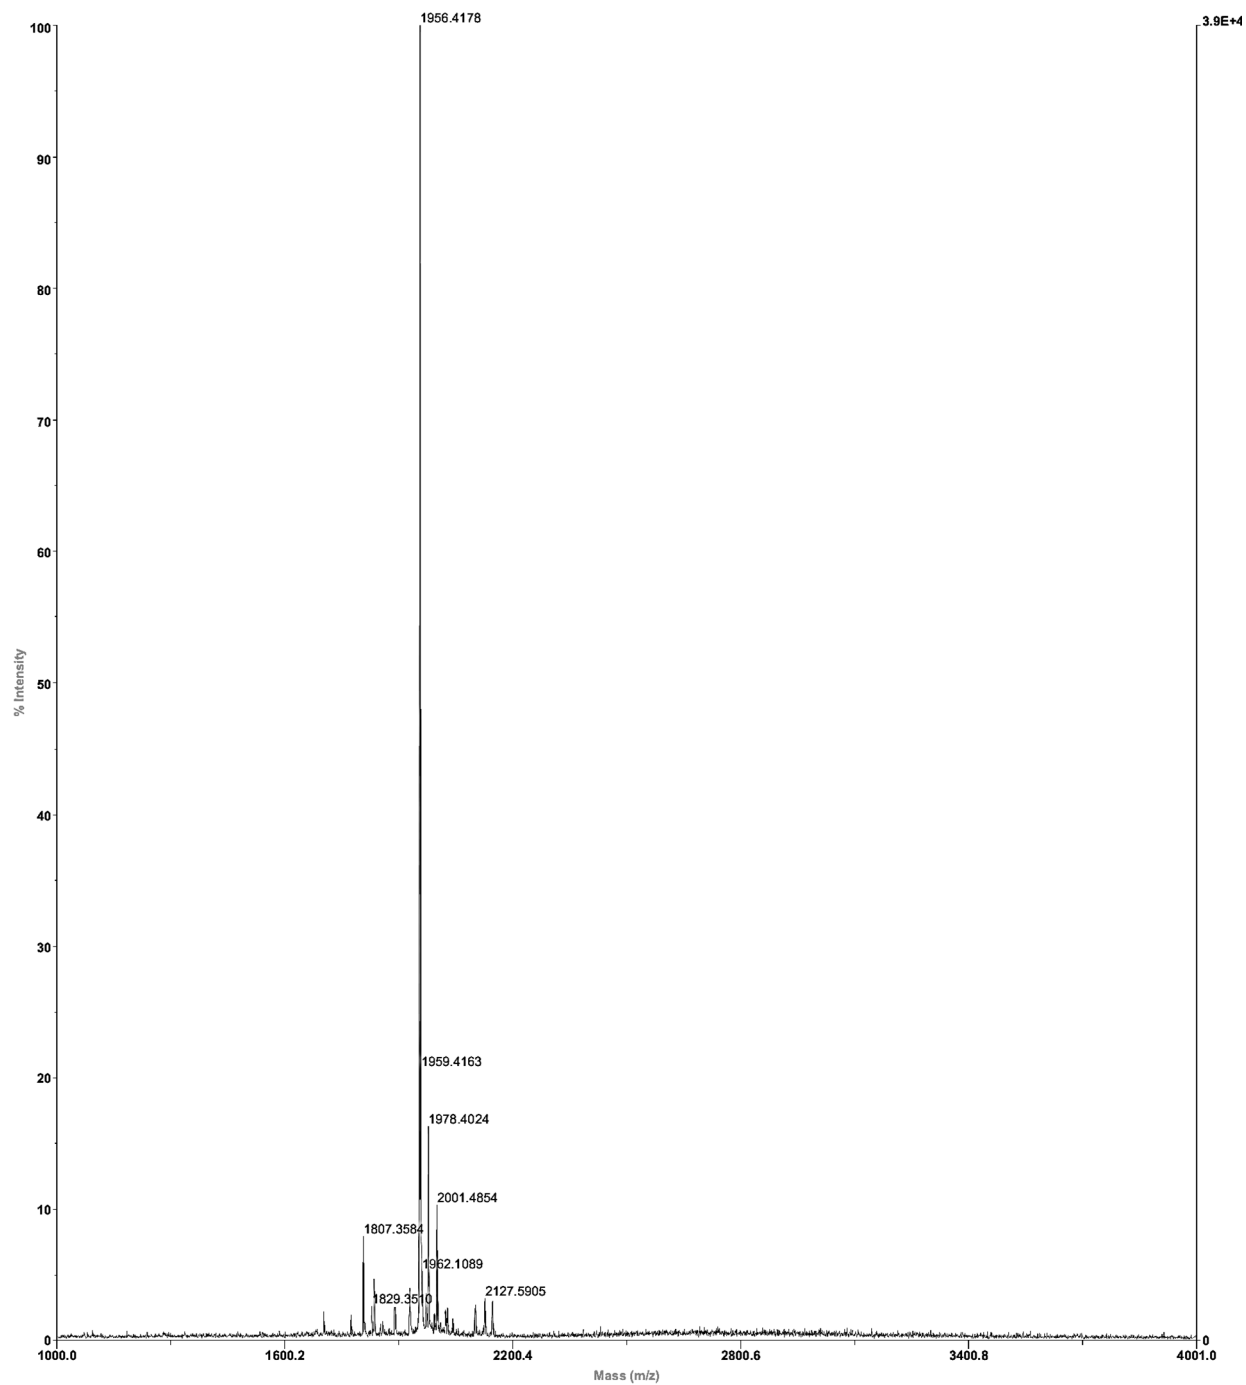

**Figure S11.** MALDI TOF analysis of AE21. Observed MW=1956.42 Da, Expected MW=1954 Da.

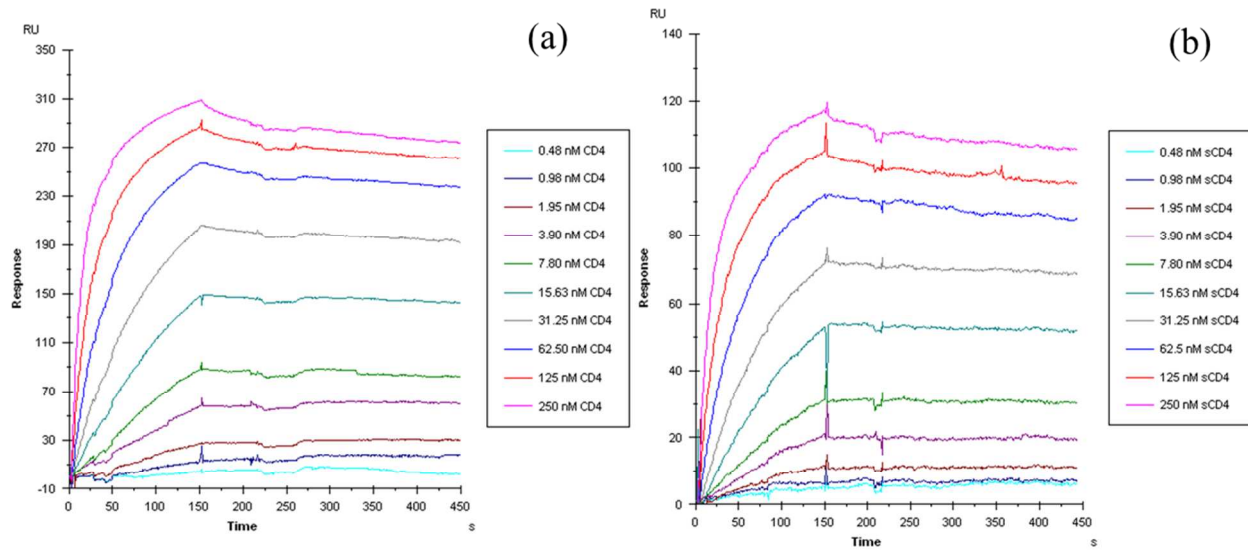

**Figure S12.** SPR sensorgrams for direct binding of sCD4 to immobilized **(a)** WT **(b)** E275C gp120<sub>YU-2</sub>. Numbers on the right show analyte concentrations (n=2).

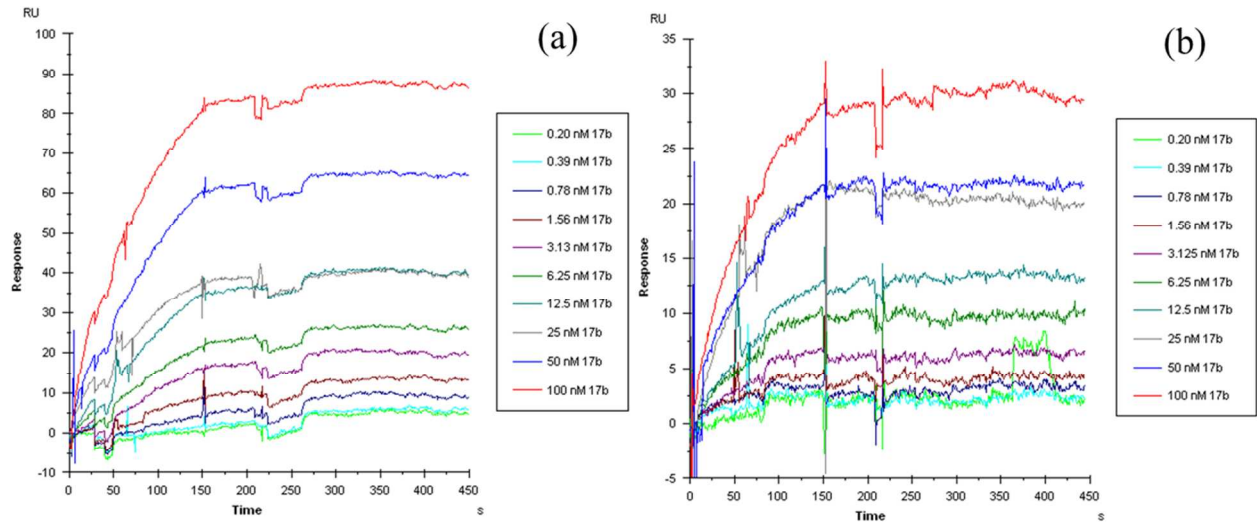

**Figure S13.** SPR sensorgrams for direct binding of mAb 17b to immobilized **(a)** WT **(b)** E275C gp120<sub>YU-2</sub>.

Numbers on the right show analyte concentrations (n=2).

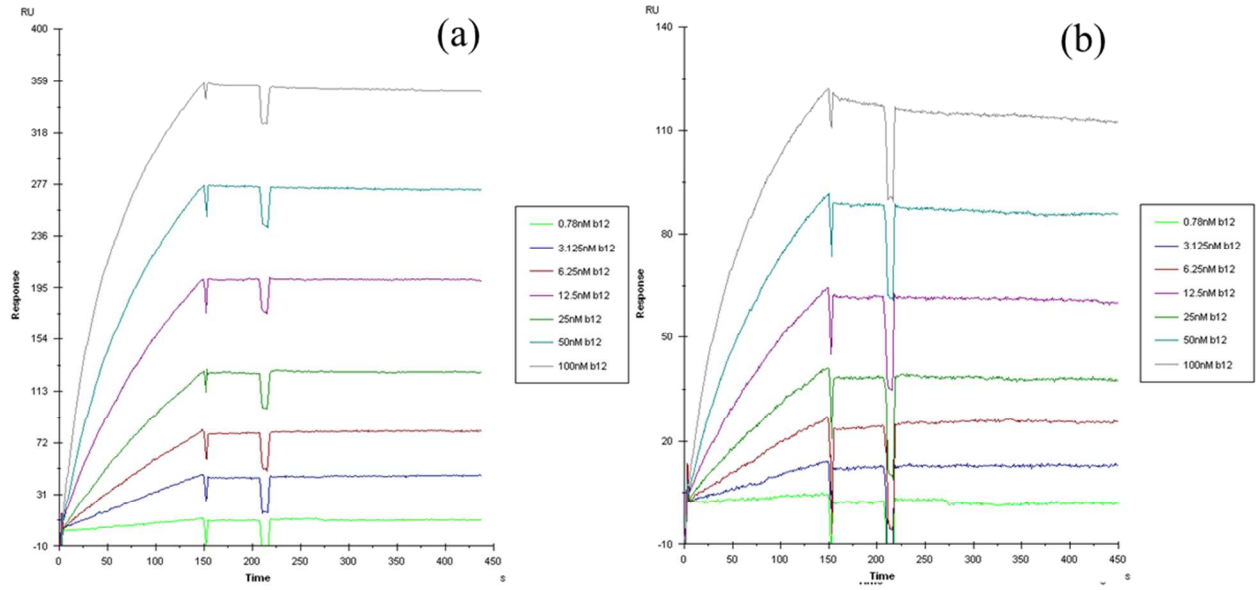

**Figure S14.** SPR sensorgrams for direct binding of mAb b12 to immobilized **(a)** WT **(b)** E275C gp120<sub>YU-2</sub>. Numbers on the right show analyte concentrations (n=2).
